# Supplementary material for: Leukotriene A4 Hydrolase Is a Candidate Predictive Biomarker for Successful Allergen Immunotherapy
Source: Front Immunol. 2020 Nov 24;11:559746. doi: 10.3389/fimmu.2020.559746 (PMC7732448; doi:10.3389/fimmu.2020.559746)
Supplement: Supplementary file 1 [file Table_1.xlsx]

## Sheet: Description
Table E1. Differentially expressed proteins after one-year AIT. Related to Figure 1
Description
1. 143 differentially expressed proteins in nonresponder cohort.
2. 47 differentially expressed proteins in responder cohort.

## Sheet: 1. nonresponder cohort
Gene names	pvalue	padjust	Median of ratio After/Before AIT
CPB2	0.00195312	0.0132999	0.875628
NCAM1	0.00195312	0.0132999	0.877441
PTPRJ	0.00195312	0.0132999	0.799083
TPSD1;TPSAB1;TPSB2;PRSS29P;HPN	0.00195312	0.0132999	2.92946
TTR	0.00390625	0.0212798	0.772992
CHL1	0.00195312	0.0132999	0.795937
CADM1	0.0078125	0.035187	0.825083
SAA2-SAA4;SAA4	0.00390625	0.0212798	1.37513
PRDX1	0.00976562	0.0390625	1.36655
C1QB	0.00390625	0.0212798	0.823584
LYZ	0.00195312	0.0132999	1.15075
CRTAC1	0.00195312	0.0132999	0.864453
GP1BA	0.00195312	0.0132999	1.54705
IGHA2	0.00976562	0.0390625	0.781898
PROCR	0.0078125	0.035187	0.897163
PRG4	0.00195312	0.0132999	1.14393
TNXB	0.00195312	0.0132999	0.867085
APOD	0.00195312	0.0132999	1.34032
CD163	0.00585938	0.0279297	0.855343
ABI3BP	0.00585938	0.0279297	0.82139
HGFAC	0.00585938	0.0279297	0.886313
PROC	0.00195312	0.0132999	0.874732
LTF	0.00195312	0.0132999	2.15228
GAPDH	0.00195312	0.0132999	1.63227
FLT4	0.00195312	0.0132999	0.867093
CFL1	0.00585938	0.0279297	1.60075
SLC3A2	0.00195312	0.0132999	0.856253
TFRC	0.00390625	0.0212798	1.15878
LAMB1	0.0078125	0.035187	0.803785
MST1;MST1L	0.00195312	0.0132999	1.35755
COMP	0.00195312	0.0132999	0.864608
AK1	0.00585938	0.0279297	1.69283
NCAM2	0.00195312	0.0132999	0.914539
SHBG	0.00195312	0.0132999	0.936763
ICAM2	0.00195312	0.0132999	1.32278
TNC	0.00390625	0.0212798	0.835015
HIST1H2BN;HIST1H2BL;HIST1H2BM;HIST1H2BH;HIST2H2BF;HIST1H2BC;HIST1H2BD;H2BFS;HIST1H2BK;HIST3H2BB;HIST2H2BE;HIST1H2BB;HIST1H2BO;HIST1H2BJ;HIST1H2BA	0.0078125	0.035187	3.12203
SF3B1	0.00195312	0.0132999	1.97591
FCN3	0.00195312	0.0132999	1.22035
LDHA	0.00195312	0.0132999	1.28157
CP	0.00195312	0.0132999	0.898816
PGK1	0.00195312	0.0132999	1.49953
F2	0.00390625	0.0212798	0.891905
F9	0.00390625	0.0212798	0.850023
F10	0.00195312	0.0132999	0.867299
F12	0.00195312	0.0132999	1.29896
CA1	0.00976562	0.0390625	1.90755
CA2	0.00585938	0.0279297	2.19727
SERPINC1	0.00195312	0.0132999	1.1505
SERPINA1	0.00195312	0.0132999	0.625651
KNG1	0.00195312	0.0132999	1.1204
IGF2	0.00976562	0.0390625	0.836129
IGJ;JCHAIN	0.00195312	0.0132999	0.765612
IGHM	0.00195312	0.0132999	0.69838
APOA2	0.00195312	0.0132999	0.846384
C1QA	0.00195312	0.0132999	0.831318
APOH	0.00195312	0.0132999	1.3342
LRG1	0.00976562	0.0390625	0.84752
ORM1	0.00390625	0.0212798	0.901917
GC	0.00390625	0.0212798	0.919921
TF	0.00390625	0.0212798	1.22166
HPX	0.00195312	0.0132999	0.917612
C4BPA	0.00195312	0.0132999	1.54665
VTN	0.00195312	0.0132999	1.11344
CAT	0.00976562	0.0390625	1.36822
ALDOA	0.00195312	0.0132999	1.30006
A1BG	0.00195312	0.0132999	0.828363
S100A8	0.00195312	0.0132999	3.16548
SERPING1	0.00195312	0.0132999	1.39976
F13B	0.00195312	0.0132999	1.55899
MPO	0.00195312	0.0132999	1.5882
SERPIND1	0.00195312	0.0132999	0.83143
BCHE	0.00976562	0.0390625	0.864386
C2	0.00195312	0.0132999	0.801794
S100A9	0.00195312	0.0132999	2.92749
ENO1	0.00195312	0.0132999	2.05277
THBS1	0.00195312	0.0132999	1.16986
SERPINA6	0.00585938	0.0279297	0.929466
HSP90AB1	0.00195312	0.0132999	1.15857
CTSG	0.0078125	0.035187	2.1177
CD14	0.00390625	0.0212798	0.89478
CFH	0.00195312	0.0132999	1.43635
C1S	0.00195312	0.0132999	0.914754
C4A	0.00195312	0.0132999	0.875716
HIST1H1C;HIST1H1E;HIST1H1D;HIST1H1T;HIST1H1A	0.00195312	0.0132999	1.86078
HSPA5	0.00195312	0.0132999	0.892682
MBL2	0.00195312	0.0132999	0.756675
COL6A3	0.00585938	0.0279297	0.842659
SELL	0.00195312	0.0132999	0.812071
PKM	0.00195312	0.0132999	1.46298
HSP90B1	0.00390625	0.0212798	0.871409
MMP9	0.00390625	0.0212798	1.56698
ANPEP	0.00976562	0.0390625	1.21164
CPN1	0.00390625	0.0212798	0.930972
TIMP2	0.00976562	0.0390625	0.853776
SELP	0.00390625	0.0212798	1.71558
IGFBP2	0.00976562	0.0390625	0.885167
VCAM1	0.00195312	0.0132999	0.872385
ITIH1	0.00195312	0.0132999	0.919363
PZP	0.00976562	0.0390625	0.910952
PROZ	0.00585938	0.0279297	0.897002
MSN	0.00195312	0.0132999	1.26251
S100A4	0.00195312	0.0132999	1.9349
CFP	0.00976562	0.0390625	0.884
CORO1A	0.00195312	0.0132999	1.73491
PRDX2	0.00585938	0.0279297	2.16207
CDH5	0.00195312	0.0132999	0.806492
THBS4	0.00585938	0.0279297	0.835225
SERPINF1	0.00195312	0.0132999	0.8903
CFHR2	0.00195312	0.0132999	1.98201
GP5	0.00390625	0.0212798	1.3112
BTD	0.00976562	0.0390625	0.887522
PGD	0.00195312	0.0132999	1.57686
ARHGDIB	0.00195312	0.0132999	1.86371
NAGLU	0.00390625	0.0212798	0.761372
PLTP	0.00976562	0.0390625	0.901151
DEFA3;DEFA1	0.00195312	0.0132999	2.3854
ACTB;ACTG1	0.00195312	0.0132999	1.7317
RAP1A;RAP1B	0.0078125	0.035187	1.59068
YWHAE	0.00195312	0.0132999	1.22486
ACTG2;ACTC1;ACTA2;ACTA1	0.00195312	0.0132999	1.4391
HIST1H4A	0.00195312	0.0132999	3.39072
YWHAZ	0.00195312	0.0132999	1.65039
HBB	0.00585938	0.0279297	1.24807
GPLD1	0.00390625	0.0212798	0.898626
LCN2	0.00390625	0.0212798	1.50955
CFHR3	0.00195312	0.0132999	1.68457
LRP1	0.00195312	0.0132999	0.832725
CNTN1	0.00390625	0.0212798	0.794543
ALCAM	0.00195312	0.0132999	0.767836
APOF	0.00195312	0.0132999	0.800987
SPARCL1	0.00390625	0.0212798	0.839668
HABP2	0.00585938	0.0279297	1.11826
ITIH4	0.00976562	0.0390625	0.884342
VEPH1	0.00585938	0.0279297	0.693143
PLXDC2	0.00195312	0.0132999	0.806381
MEGF8	0.00585938	0.0279297	0.82357
SERPINA11	0.0078125	0.035187	0.83482
DNAAF1	0.00195312	0.0132999	0.384398
GGH	0.00195312	0.0132999	0.784967
FUCA2	0.00976562	0.0390625	0.871338
MINPP1	0.00195312	0.0132999	0.829103
TLN1	0.00195312	0.0132999	1.86543

## Sheet: 2. responder cohort
Gene names	pvalue	padjust	Median of ratio After/Before AIT
TTR	0.00195312	0.0349731	1.25446
IGHA2	0.00390625	0.047623	0.850174
CFHR1	0.00390625	0.047623	0.84795
ABI3BP	0.00390625	0.047623	0.892803
PROC	0.00390625	0.047623	0.906557
LTF	0.00195312	0.0349731	2.17732
OLFM1	0.00390625	0.047623	0.936585
CRISP3	0.00195312	0.0349731	0.903137
C3	0.00390625	0.047623	0.904759
ATRN	0.00195312	0.0349731	0.915773
APOM	0.00195312	0.0349731	0.867932
LDHA	0.00390625	0.047623	1.26592
F2	0.00195312	0.0349731	0.929804
F10	0.00390625	0.047623	0.927606
PLG	0.00195312	0.0349731	0.9216
IGJ;JCHAIN	0.00195312	0.0349731	0.878264
IGHM	0.00195312	0.0349731	0.762826
APOH	0.00390625	0.047623	0.900662
AMBP	0.00195312	0.0349731	0.931468
ALDOA	0.00195312	0.0349731	1.3733
S100A8	0.00195312	0.0349731	3.45931
MPO	0.00195312	0.0349731	1.61163
SERPIND1	0.00390625	0.047623	0.934902
BCHE	0.00390625	0.047623	0.926392
S100A9	0.00195312	0.0349731	3.67369
ENO1	0.00195312	0.0349731	1.99434
HSP90AB1	0.00195312	0.0349731	1.42494
LTA4H	0.00195312	0.0349731	1.43637
HSPA5	0.00195312	0.0349731	0.915016
SELL	0.00390625	0.047623	0.942517
PKM	0.00195312	0.0349731	1.30409
LBP	0.00195312	0.0349731	1.18764
VCAM1	0.00195312	0.0349731	0.854477
ORM2	0.00195312	0.0349731	0.889536
C4BPB	0.00390625	0.047623	1.31642
MSN	0.00390625	0.047623	1.28468
BTD	0.00390625	0.047623	0.958635
PGD	0.00195312	0.0349731	1.93985
ARHGDIB	0.00195312	0.0349731	1.60829
DEFA3;DEFA1	0.00195312	0.0349731	2.42928
ACTB;ACTG1	0.00195312	0.0349731	1.61673
ACTG2;ACTC1;ACTA2;ACTA1	0.00195312	0.0349731	1.61076
HIST1H4A	0.00195312	0.0349731	2.61931
LCN2	0.00195312	0.0349731	1.43249
APOF	0.00195312	0.0349731	0.844893
DNAAF1	0.00195312	0.0349731	0.8206
MUC5B	0.00195312	0.0349731	0.508908
